# Supplementary material for: Water-stable hydrazone-linked porous organic cages
Source: Royal Society of Chemistry journal article supplement (doi:10.1039/d1sc04531h), 2021-01-01
Supplement: d1sc04531h2.pdf [file d1sc04531h2.pdf]

# Towards Water-stable Porous Organic Cages for Pollutant Removal

Chemical  
Science

Porous organic cages (POCs) have possible applications in

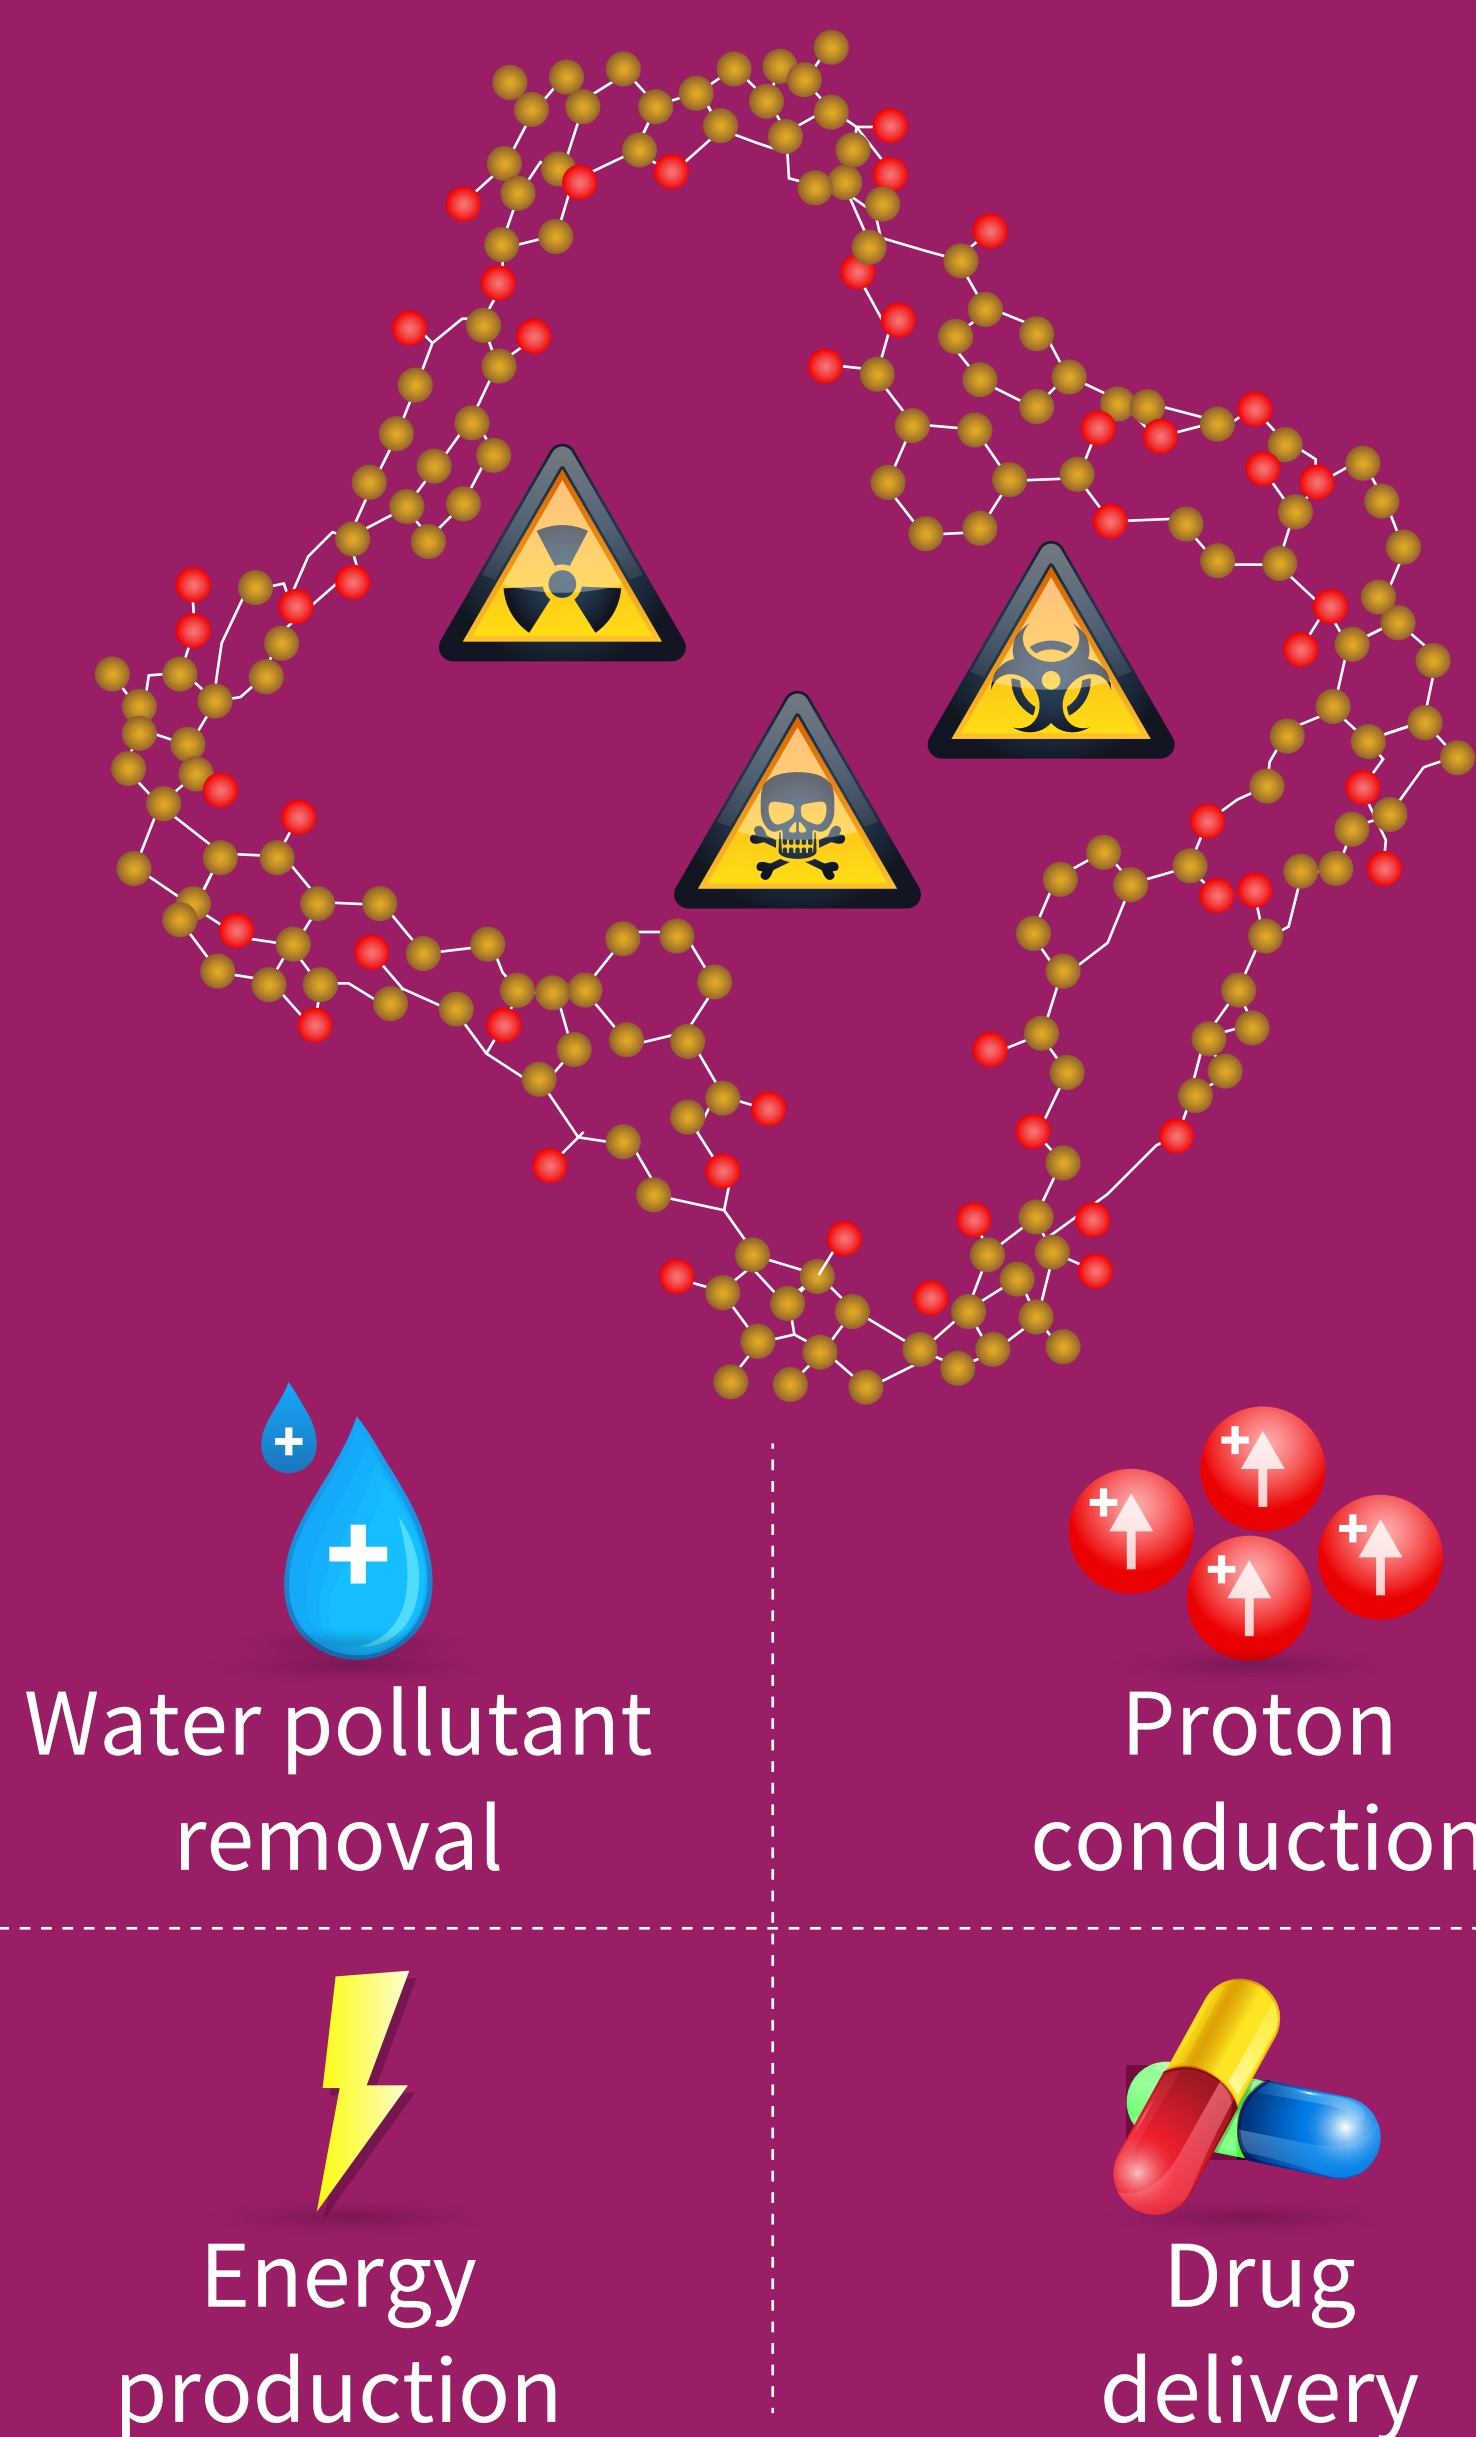

However...

- ⚠ Imine-linked (C=N) cages are prone to hydrolysis and collapse
- ⚠ The syntheses of water-stable POCs are often multi-step, use expensive catalysts and have low yield

Can a convenient method for constructing water-stable POCs be developed?

7 hydrazone-linked POCs prepared using the same tetraformylresorcin[4]-arene cavitand and three different types of dihydrazide ligands

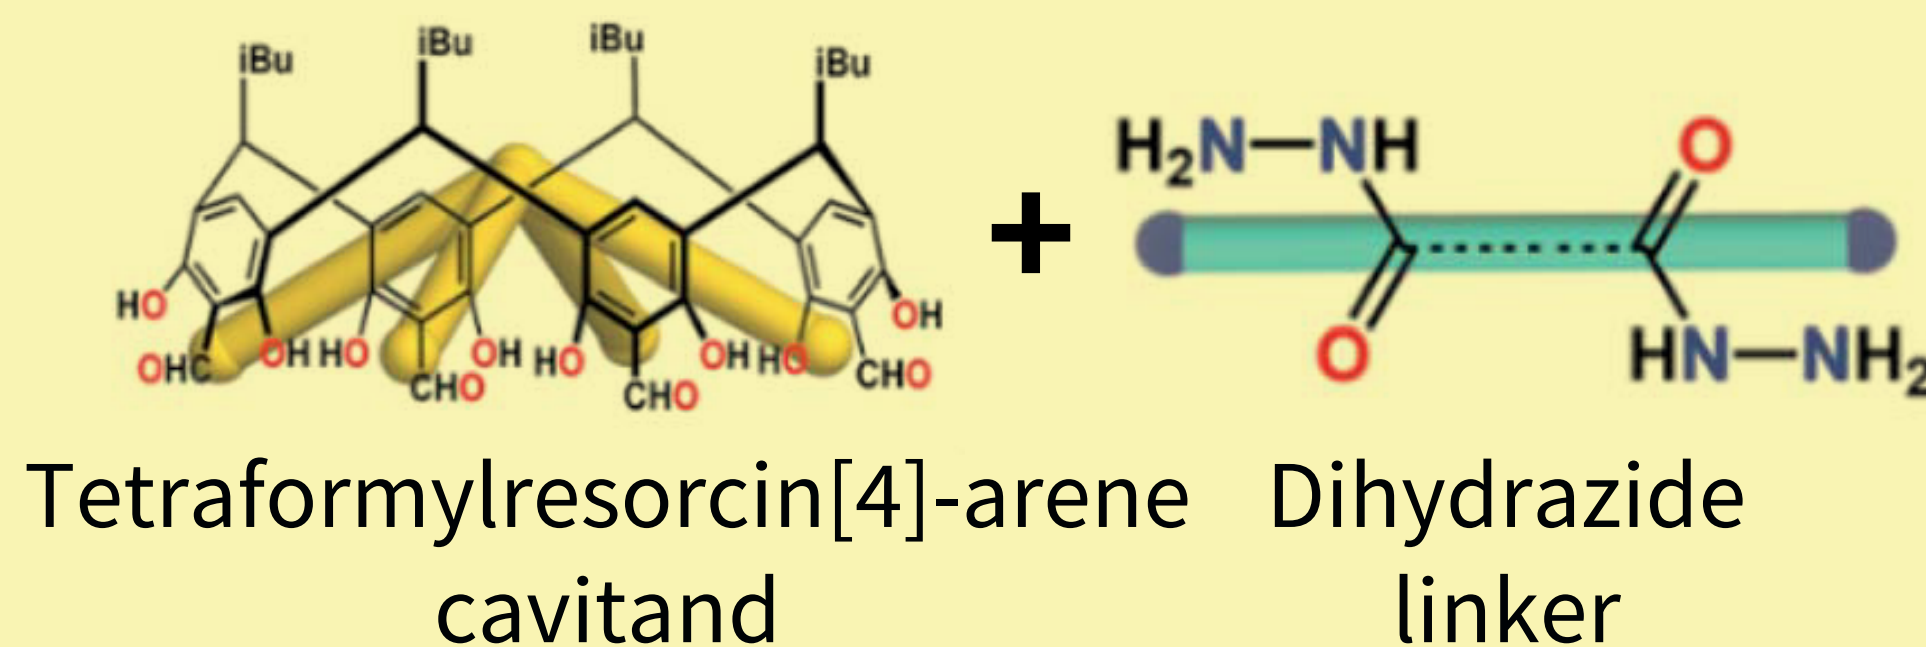

Self-assembly

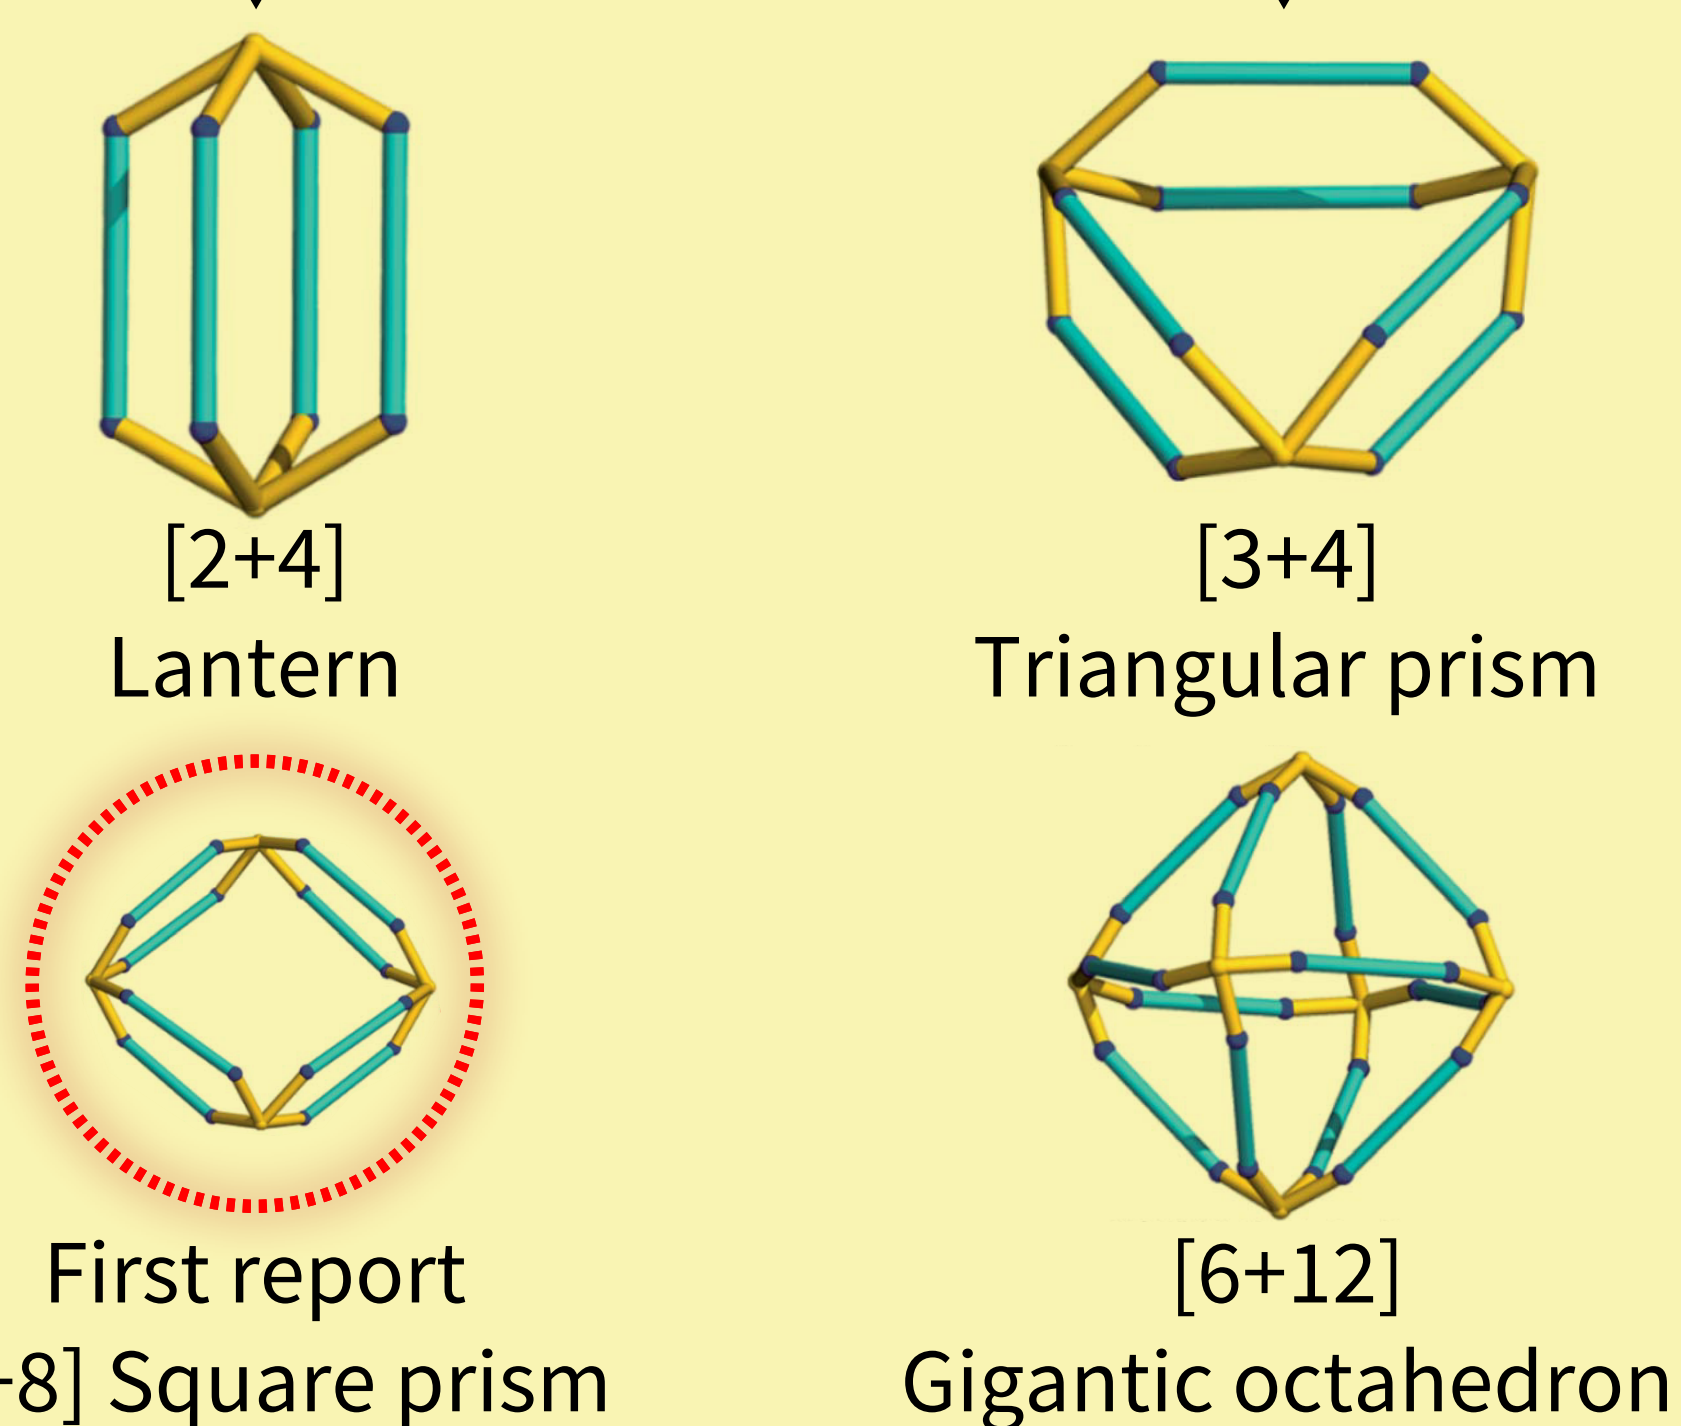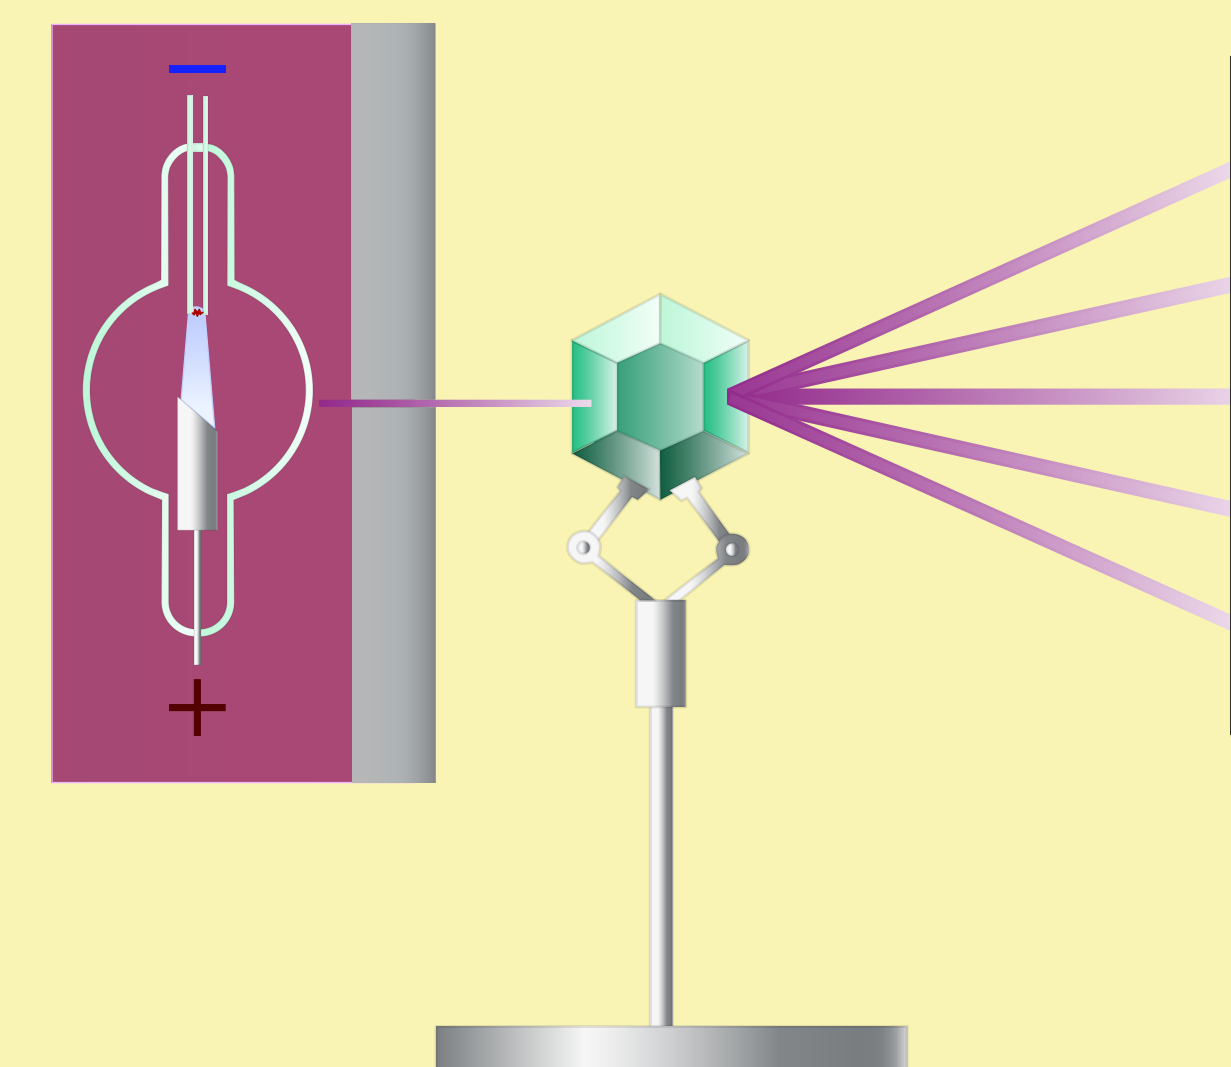

Single-crystal X-ray diffraction

The new structures

- ✓ Exhibit tunability
- ✓ Are stable in water
- ✓ Can encapsulate pollutants

A facile method for constructing robust POCs is developed that can remove toxic pollutants from water
